# Supplementary material for: A simple and rapid colorimetric detection of serum lncRNA biomarkers for diagnosis of pancreatic cancer
Source: Royal Society of Chemistry journal article supplement (doi:10.1039/c9ra07858d), 2020-01-01
Supplement: c9ra07858d1.pdf [file c9ra07858d1.pdf]

Supplementary information

## Simple and rapid colorimetric detection of serum lncRNA biomarkers for diagnosis of pancreatic cancer

### Supplementary tables and figures:

| Primer 2 | Sequences (5'-3')                         | Concentrations |
|----------|-------------------------------------------|----------------|
| F3       | CTTTCTGGCCGTTTCACCA                       | 0.2 $\mu$ M    |
| B3       | TGCTGCCTGTGTCTCTACG                       | 0.2 $\mu$ M    |
| FIP      | GGAACAGGGGCCTAGAACCCTACTCCCTCCAAGTGGCATTG | 1.6 $\mu$ M    |
| BIP      | ACATACTGGTCAGACACGGCTGCTCGCATGGCAGTTCTCAT | 1.6 $\mu$ M    |
| LF       | CTGTCTCTTTGTCACTGTGAGTTTT                 | 0.8 $\mu$ M    |
| LB       | GAGGCCAAGGTCAAGTTGAAAGT                   | 0.8 $\mu$ M    |

**Table S1.** Sequences and concentrations of HOTTIP primers for loop-mediated isothermal amplification.

| Temperature |                         |                  | 55°C | 60°C | 65°C |
|-------------|-------------------------|------------------|------|------|------|
| Primers     | F3/B3                   | Positive control | -    | -    | -    |
|             |                         | Negative control | -    | -    | -    |
|             | F3/B3 + LF/LB           | Positive control | -    | -    | -    |
|             |                         | Negative control | -    | -    | -    |
|             | F3/B3 + FIP/BIP         | Positive control | -    | +    | +    |
|             |                         | Negative control | -    | -    | -    |
|             | F3/B3 + LF/LB + FIP/BIP | Positive control | +    | +    | +    |
|             |                         | Negative control | +    | +    | +    |

**Figure S1.** Effect of temperature and primer combinations on LAMP reaction. LAMP products were analysed under agarose gel electrophoresis. F3/B3 primers with or without LF/LB primers could not generate ladder-like multiple bands. Primer combination including all three primer pairs generated false positive results due to non-specificity of loop primers. Only F3/B3 with FIP/BIP produced true amplifications above 55°C, therefore was selected for subsequent LAMP reactions. +: multiple bands obtained from LAMP; -: no band or single band obtained from LAMP.

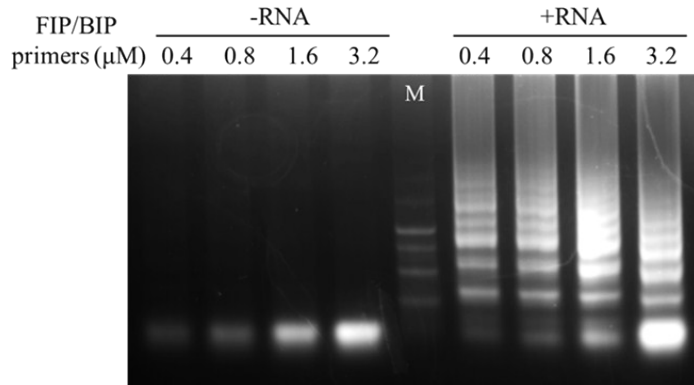

**Figure S2.** Optimization on FIP and BIP primer concentrations. Optimized inner primer concentration was 1.6 $\mu$ M.

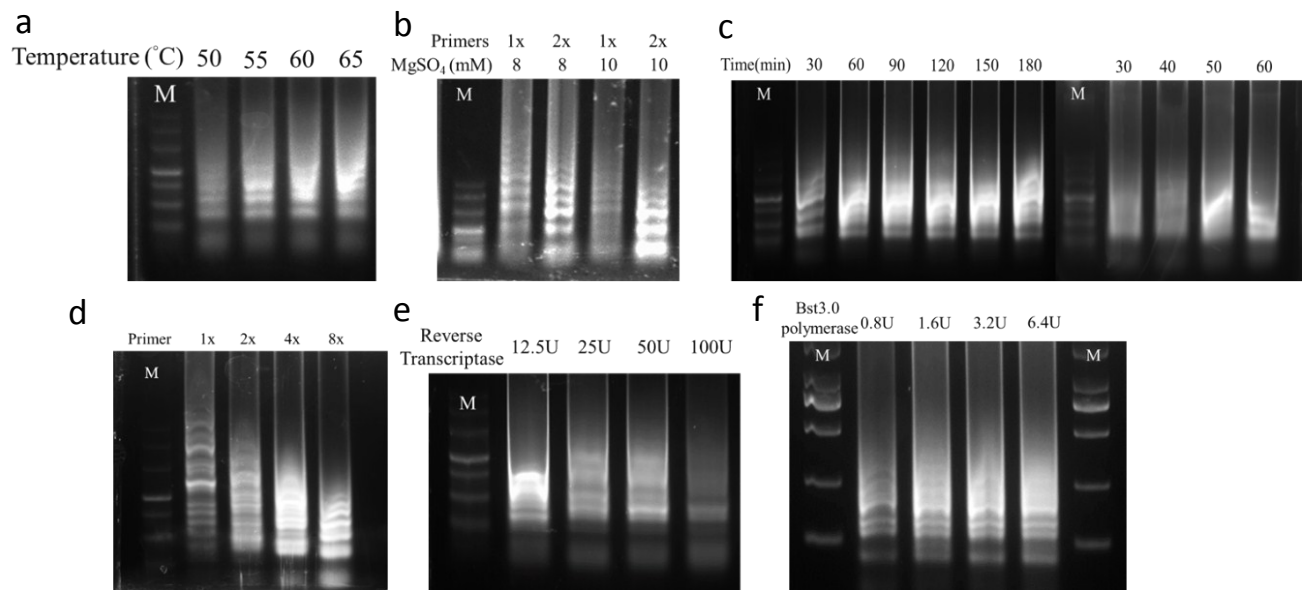

**Figure S3.** Optimization of LAMP conditions with different (a) temperature; (b) MgSO<sub>4</sub>; (c) incubation time; (d) primer concentration; (e) reverse transcriptase; (f) Bst3.0 polymerase. Optimized LAMP reaction was performed with 8mM MgSO<sub>4</sub>, 1x Primers, 12.5U Reverse transcriptase, 1.6U Bst3.0 polymerase at 60 $^{\circ}$ C for 60min.

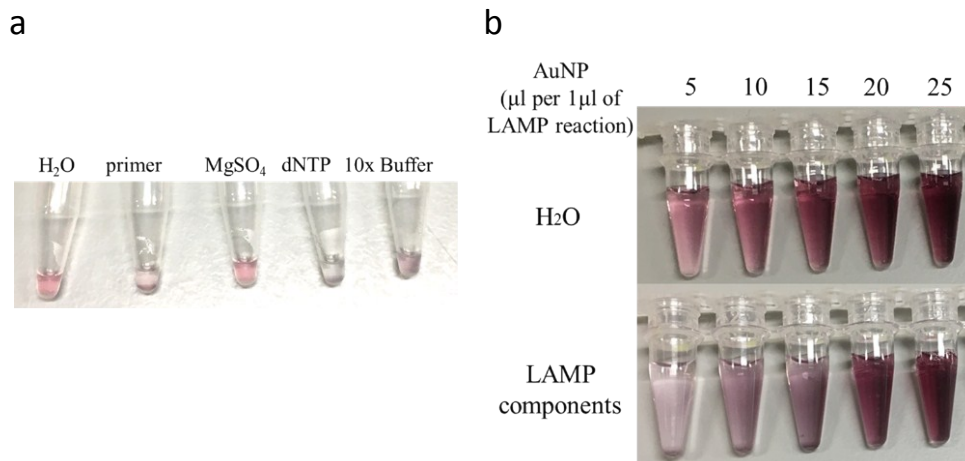

**Figure S4.** Optimization of (+)AuNP volume. (a) Effect of LAMP reaction components including primers, MgSO<sub>4</sub>, dNTP and 10x buffer on 5 μL AuNP. Nanoparticles may be precipitated by primers and dNTP. (b) Overcoming interference of LAMP components using different ratios of LAMP product to (+)AuNPs. Optimized volume was 20 μL for each μL of LAMP reaction product.
